# Supplementary material
Source: PubMed Central journal article supplement (PMC5998936)

Supplementary table 1: Antibody overview of all patients.

|                                        | Primary of secondary APS | Lupus anticoagulant | Anti-cardiolipin antibodies | Anti-cardiolipin isotype | Anti-β2-GPI antibodies | Anti-β2-GPI isotype |
|----------------------------------------|--------------------------|---------------------|-----------------------------|--------------------------|------------------------|---------------------|
| Patients without vitamin K antagonists | PAPS                     | yes                 | yes                         | IgG                      | yes                    | IgG                 |
|                                        | PAPS                     | yes                 | yes                         | IgG                      | yes                    | IgG                 |
|                                        | PAPS                     | yes                 | yes                         | IgG                      | yes                    | IgG+IgM             |
|                                        | PAPS                     | yes                 | yes                         | IgG+IgM                  | yes                    | IgG                 |
|                                        | PAPS                     | yes                 | yes                         | IgG+IgM                  | yes                    | IgG                 |
|                                        | SAPS                     | yes                 | yes                         | IgG+IgM                  | yes                    | IgG+IgM             |
|                                        | SAPS                     | yes                 | yes                         | IgG+IgM                  | yes                    | IgG+IgM             |
|                                        | SAPS                     | yes                 | yes                         | IgG+IgM                  | yes                    | IgG+IgM             |
|                                        | PAPS                     | yes                 | yes                         | IgM                      | yes                    | IgG+IgM             |
|                                        | SAPS                     | yes                 | yes                         | IgG                      | no                     |                     |
|                                        | PAPS                     | yes                 | yes                         | IgG                      | no                     |                     |
|                                        | SAPS                     | yes                 | yes                         | IgG+IgM                  | no                     |                     |
|                                        | PAPS                     | yes                 | yes                         | IgG+IgM                  | no                     |                     |
|                                        | PAPS                     | yes                 | yes                         | IgG                      |                        |                     |
|                                        | SAPS                     | yes                 | yes                         | IgG                      |                        |                     |
|                                        | PAPS                     | yes                 | yes                         | IgG+IgM                  |                        |                     |
|                                        | PAPS                     | yes                 | no                          |                          | no                     |                     |
|                                        | PAPS                     | yes                 | no                          |                          | no                     |                     |
|                                        | SAPS                     | yes                 | no                          |                          | no                     |                     |
|                                        | SAPS                     | yes                 | no                          |                          | no                     |                     |
|                                        | SAPS                     | yes                 | no                          |                          | no                     |                     |
|                                        | PAPS                     | no                  | yes                         | IgG                      | yes                    | IgG+IgM             |
|                                        | PAPS                     | no                  | yes                         | IgM                      | yes                    | IgG+IgM             |
|                                        | PAPS                     | no                  | yes                         | IgM                      | yes                    | IgM                 |
|                                        | PAPS                     | no                  | yes                         | IgM                      | yes                    | IgM                 |
|                                        | PAPS                     | no                  | yes                         | IgG                      | no                     |                     |
|                                        | PAPS                     | no                  | yes                         | IgG                      | no                     |                     |
|                                        | PAPS                     | no                  | yes                         | IgM                      | no                     |                     |
|                                        | PAPS                     | no                  | yes                         | IgM                      | no                     |                     |
|                                        | PAPS                     | no                  | yes                         | IgM                      | no                     |                     |
| PAPS                                   | no                       | yes                 | IgG+IgM                     |                          |                        |                     |
| PAPS                                   | no                       | yes                 | IgM                         |                          |                        |                     |
| Patients with vitamin K antagonists    | PAPS                     | yes                 | yes                         | IgG                      | yes                    | IgG                 |
|                                        | SAPS                     | yes                 | yes                         | IgG                      | yes                    | IgG                 |
|                                        | PAPS                     | yes                 | yes                         | IgG                      | yes                    | IgG                 |
|                                        | SAPSL                    | yes                 | yes                         | IgG                      | yes                    | IgG                 |
|                                        | SAPS                     | yes                 | yes                         | IgG                      | yes                    | IgG                 |
|                                        | SAPS                     | yes                 | yes                         | IgG                      | yes                    | IgG+IgM             |
|                                        | PAPS                     | yes                 | yes                         | IgG                      | yes                    | IgG+IgM             |
|                                        | PAPS                     | yes                 | yes                         | IgG                      | yes                    | IgG+IgM             |

|      |     |     |         |     |         |
|------|-----|-----|---------|-----|---------|
| SAPS | yes | yes | IgG     | yes | IgG+IgM |
| PAPS | yes | yes | IgG     | yes | IgG+IgM |
| SAPS | yes | yes | IgG+IgM | yes | IgG     |
| PAPS | yes | yes | IgG+IgM | yes | IgG     |
| PAPS | yes | yes | IgG+IgM | yes | IgG+IgM |
| SAPS | yes | yes | IgG+IgM | yes | IgG+IgM |
| PAPS | yes | yes | IgG+IgM | yes | IgG+IgM |
| SAPS | yes | yes | IgG+IgM | yes | IgG+IgM |
| PAPS | yes | yes | IgG+IgM | yes | IgG+IgM |
| PAPS | yes | yes | IgG+IgM | yes | IgG+IgM |
| PAPS | yes | yes | IgG+IgM | yes | IgG+IgM |
| PAPS | yes | yes | IgG+IgM | yes | IgG+IgM |
| PAPS | yes | yes | IgG+IgM | yes | IgG+IgM |
| SAPS | yes | yes | IgG+IgM | yes | IgG+IgM |
| PAPS | yes | yes | IgG+IgM | yes | IgG+IgM |
| PAPS | yes | yes | IgG+IgM | yes | IgG+IgM |
| PAPS | yes | yes | IgM     | yes | IgM     |
| PAPS | yes | yes | IgM     | yes | IgM     |
| SAPS | yes | yes | IgG     | no  |         |
| SAPS | yes | yes | IgG     | no  |         |
| PAPS | yes | yes | IgG     | no  |         |
| PAPS | yes | yes | IgM     | no  |         |
| PAPS | yes | yes | IgG     |     |         |
| PAPS | yes | yes | IgG     |     |         |
| PAPS | yes | yes | IgG+IgM |     |         |
| SAPS | yes | no  |         | no  |         |
| PAPS | yes | no  |         | no  |         |
| SAPS | yes | no  |         | no  |         |
| SAPS | yes | no  |         | no  |         |
| PAPS | yes | no  |         | no  |         |
| SAPS | yes | no  |         |     |         |
| PAPS | no  | yes | IgG     | yes | IgG     |
| SAPS | no  | yes | IgG+IgM | yes | IgG+IgM |
| PAPS | no  | yes | IgG     | no  |         |
| PAPS | no  | yes | IgM     | no  |         |
| PAPS | no  | yes | IgM     | no  |         |
| SAPS | no  | yes | IgG     |     |         |
| PAPS | no  | yes | IgG     |     |         |

**Supplementary figure 1:** Thrombin generation in antiphospholipid syndrome patients and controls on vitamin K antagonist therapy. Average thrombin generation curves are shown for controls on VKA therapy (dashed line) and APS patients (continuous line) at 1 (A) and 5 (B) pM TF. Thrombin generation parameters lag time (C+E), time-to-peak (D+F), peak height (G+I) and ETP (H+J) were quantified, respectively for 1 and 5 pM TG curves. No significant differences were detected between the groups using a 2-sided Mann-Whitney test.

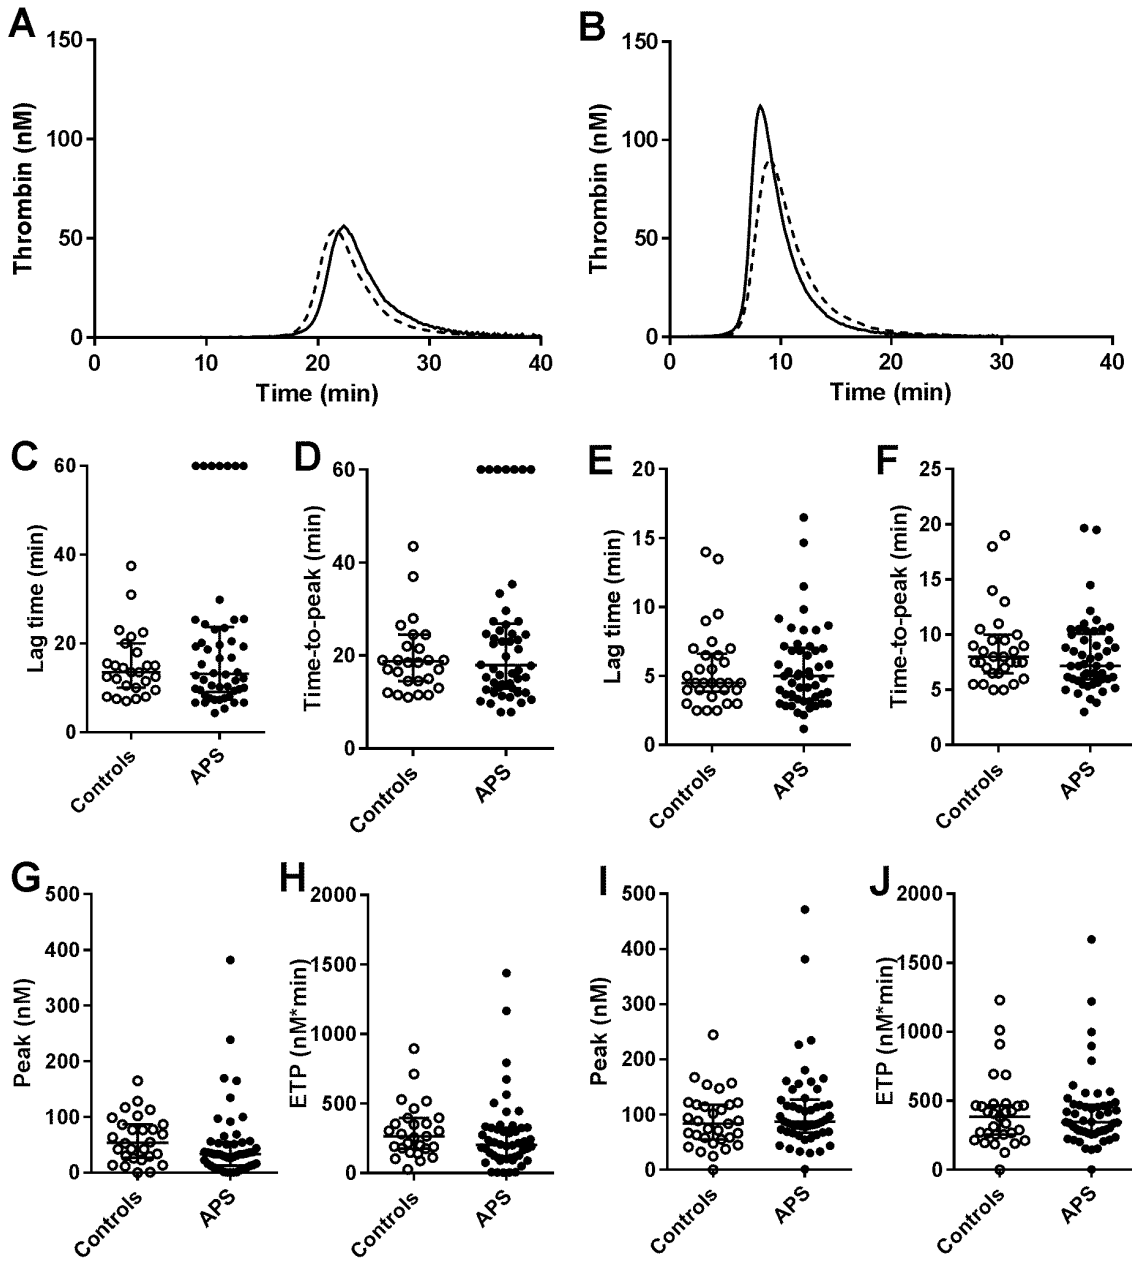

**Supplementary figure 2:** Prothrombin conversion in antiphospholipid syndrome patients and controls on vitamin K antagonist therapy. Average prothrombin conversion curves are shown for controls on VKA therapy (dashed line) and APS patients (continuous line) at 1 (A) and 5 (B) pM TF. Prothrombin conversion parameters total amount of prothrombin converted (PCtot; C+E) and maximum rate of prothrombin conversion (PCmax; D+F) were quantified, respectively for 1 and 5 pM TG curves. \*\*\* $p < 0.001$ , \*\* $p < 0.01$  according to a 2-sided Mann-Whitney test.

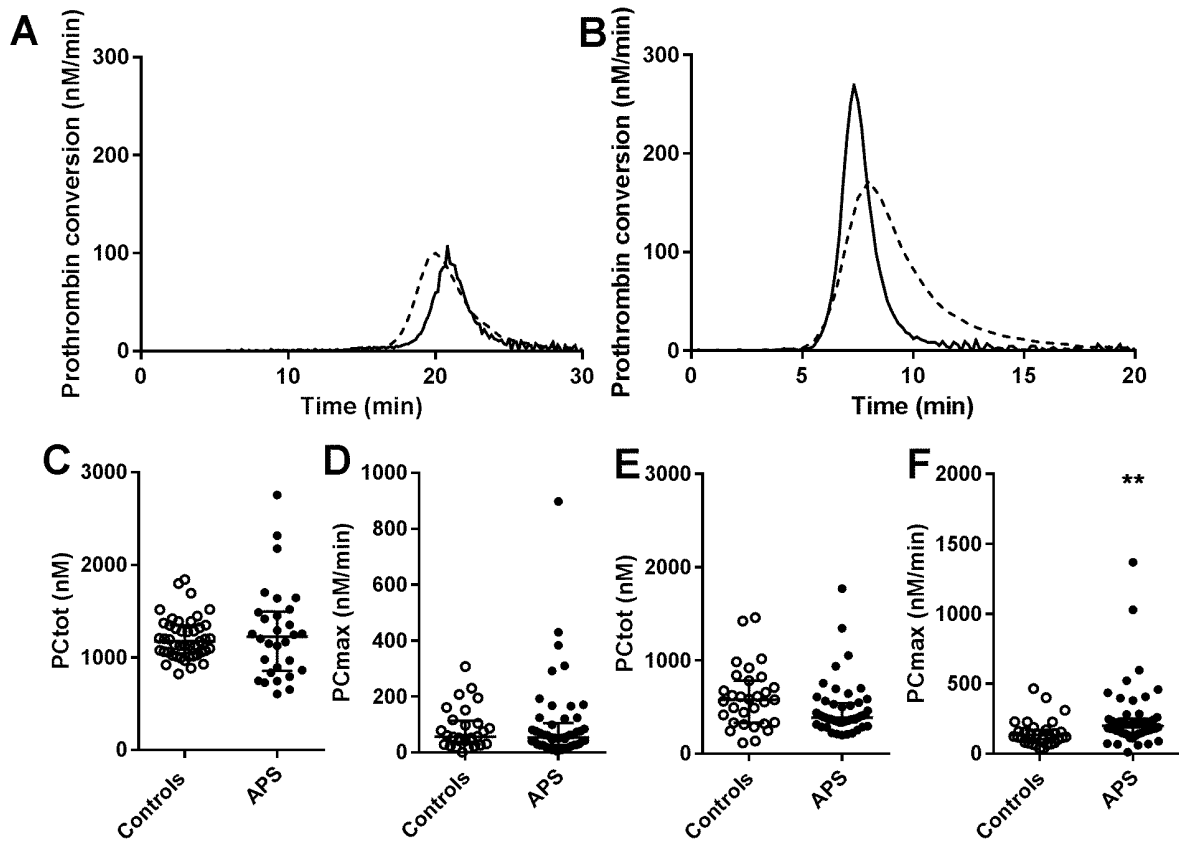

Supplement: ba018036-suppl1.pdf [file ba018036-suppl1.pdf]
